# Supplementary material for: TERT Promoter Mutation Analysis for Blood-Based Diagnosis and Monitoring of Gliomas
Source: Oxford University Press journal article supplement (doi:10.1158/1078-0432.ccr-20-3083), 2020-10-13
Supplement: 10780432ccr203083-sup-248838_2_supp_6630724_qh99hm.pdf [file 10780432ccr203083-sup-248838_2_supp_6630724_qh99hm.pdf]

**Supplementary Table 1. Patient Characteristics for Discovery Cohort 1. Tumor volume calculated by taking three measurements and using the following formula:  $4\pi/3 * R1 * R2 * R3$ . GBM = Glioblastoma, WT= Wildtype, N/A = Not Available, M=Male, F=Female**

| Study ID  | Age | Sex | WHO Grade | Diagnosis                   | IDH1 status | Location              | Volume (cm <sup>3</sup> ) | Contrast Enhancement | Duration (weeks) | Recurrent | TERT Status (MGH) | TERT Status by ddPCR (Tissue) | Copies/20 $\mu$ L of TERT Mutant from Tumor Tissue ddPCR | Copies/mL of TERT Mutant from ddPCR of Matched Plasma | Copies/mL of TERT WT from ddPCR of Matched Plasma |
|-----------|-----|-----|-----------|-----------------------------|-------------|-----------------------|---------------------------|----------------------|------------------|-----------|-------------------|-------------------------------|----------------------------------------------------------|-------------------------------------------------------|---------------------------------------------------|
| MGH-19046 | 24  | M   | III       | Recurrent Oligodendroglioma | IDH1 R132H  | L frontal             | 3.015929                  | YES                  | N/A              | YES       | C228T             | C228T                         | 1720                                                     | 10.25                                                 | 2941.25                                           |
| BC-18037  | 67  | M   | IV        | GBM                         | WT          | R frontotemporal      | 696.5372                  | YES                  | 4                | NO        | C250T             | C250T                         | 303                                                      | 7.25                                                  | 2598.75                                           |
| BC-18040  | 48  | F   | IV        | GBM                         | WT          | R frontal             | 217.7752                  | YES                  | 4                | NO        | C250T             | C250T                         | 522                                                      | 19.375                                                | 2473.75                                           |
| MGH-19061 | 61  | M   | IV        | GBM                         | WT          | L temporal            | 265.8541                  | YES                  | 8                | NO        | C228T             | C228T                         | 3103                                                     | 17.75                                                 | 4750                                              |
| MGH-18061 | 49  | M   | III       | Anaplastic Astrocytoma      | IDH1 R132S  | R mesial temporal     | 327.6807                  | NO                   | 4                | NO        | C228T             | C228T                         | 3120                                                     | 11.125                                                | 508.75                                            |
| BC-17013  | 57  | M   | N/A       | GBM                         | WT          | R temporal            | 32.75634                  | YES                  | N/A              | YES       | C228T             | C228T                         | 431                                                      | 30.5                                                  | 3448.75                                           |
| MGH-18116 | 29  | F   | II        | Oligodendroglioma           | IDH1 R132H  | R frontal             | 14.70265                  | NO                   | 7                | NO        | C228T             | C228T                         | 1035                                                     | 14.125                                                | 222.5                                             |
| MGH-18099 | 46  | F   | N/A       | Recurrent Oligodendroglioma | IDH1 R132H  | L temporal            | 424.869                   | NO                   | N/A              | YES       | C250T             | C250T                         | 1682                                                     | 8.875                                                 | 427.5                                             |
| MGH-19006 | 71  | M   | IV        | GBM                         | WT          | L anterior temporal   | 267.7475                  | YES                  | 4                | NO        | Unknown           | C228T                         | 2416                                                     | 10.375                                                | 547.5                                             |
| MGH-19059 | 77  | M   | IV        | Diffuse Astrocytoma         | WT          | L temporal/occipital  | N/A                       | N/A                  | 4                | NO        | C228T             | C228T                         | 3260                                                     | 8.875                                                 | 78.75                                             |
| MGH-19038 | 54  | F   | IV        | GBM                         | WT          | R temporoparietal     | 23.49911                  | YES                  | 3                | NO        | C228T             | C228T                         | 3630                                                     | 7                                                     | 2548.75                                           |
| MGH-18086 | 38  | F   | II        | Oligodendroglioma           | IDH1 R132H  | R frontoparietal      | 696.6796                  | YES                  | 3                | NO        | C250T             | C250T                         | 1593                                                     | 9.125                                                 | 600                                               |
| BC-18022  | 46  | F   | IV        | GBM                         | WT          | R frontoparietal      | 387.4631                  | YES                  | 4                | NO        | C250T             | C250T                         | 653                                                      | 15.85714                                              | 2057.143                                          |
| BC-17045  | 47  | F   | IV        | GBM                         | IDH1 R132C  | R temporal            | 377.3681                  | YES                  | 6                | NO        | C250T             | C250T                         | 104                                                      | 14.85714                                              | 2350                                              |
| MGH-18092 | 63  | M   | IV        | GBM                         | WT          | L temporo-parietal    | 61.92707                  | YES                  | 4                | NO        | C250T             | C250T                         | 441                                                      | 15.75                                                 | 475                                               |
| MGH-18078 | 52  | M   | IV        | GBM                         | WT          | L frontal             | 686.8276                  | YES                  | 3                | NO        | Unknown           | C228T                         | 1826                                                     | 14.75                                                 | 588.75                                            |
| MGH-18133 | 74  | F   | IV        | GBM                         | WT          | L temporal            | 16.9646                   | YES                  | 6                | NO        | C228T             | C228T                         | 1229                                                     | 8.625                                                 | 1818.75                                           |
| MGH-19030 | 41  | M   | IV        | GBM                         | WT          | R temporal            | 360.215                   | YES                  | 3                | NO        | C228T             | C228T                         | 880                                                      | 6.25                                                  | 943.75                                            |
| MGH-18113 | 82  | M   | IV        | GBM                         | WT          | R parietal            | 99.42512                  | YES                  | 1                | NO        | C228T             | C228T                         | 415                                                      | 14.375                                                | 1426.25                                           |
| MGH-19050 | 50  | M   | IV        | GBM                         | WT          | R occipital           | 96.20813                  | YES                  | 8                | NO        | C228T             | C228T                         | 2218                                                     | 2.875                                                 | 917.5                                             |
| MGH-18104 | 74  | F   | IV        | Residual GBM                | WT          | L anterior temporal   | 23.12212                  | YES                  | N/A              | NO        | C228T             | C250T                         | 391                                                      | 7.375                                                 | 1602.5                                            |
| MGH-19065 | 30  | M   | III       | Anaplastic Astrocytoma      | IDH1 R132G  | R posterior           | 136.1692                  | NO                   | 8                | NO        | WT                | WT                            | 2.3                                                      | 8.428572                                              | 870.0001                                          |
| MGH-19015 | 64  | F   | N/A       | Recurrent/Residual GBM      | IDH1 R132H  | R frontal, multifocal | 8.385958                  | YES                  | N/A              | YES       | WT                | WT                            | 0                                                        | 5.285715                                              | 2287.143                                          |
| MGH-18060 | 43  | M   | IV        | GBM                         | IDH1 R132H  | L frontal             | 458.5804                  | YES                  | 13               | NO        | WT                | WT                            | 0                                                        | 6.428572                                              | 2851.429                                          |
| MGH-19019 | 39  | M   | II        | Diffuse Astrocytoma         | IDH1 R132H  | L parietal            | 291.5398                  | YES                  | 24               | NO        | WT                | WT                            | 1.8                                                      | 7                                                     | 2021.429                                          |
| C2019-027 | 30  | F   | N/A       | N/A                         | N/A         | N/A                   | N/A                       | N/A                  | N/A              | N/A       | WT                | N/A                           | N/A                                                      | 7.625                                                 | 7075                                              |
| C2019-014 | 24  | F   | N/A       | N/A                         | N/A         | N/A                   | N/A                       | N/A                  | N/A              | N/A       | WT                | N/A                           | N/A                                                      | 8.375                                                 | 1121.25                                           |
| C2019-024 | 25  | F   | N/A       | N/A                         | N/A         | N/A                   | N/A                       | N/A                  | N/A              | N/A       | WT                | N/A                           | N/A                                                      | 4.875                                                 | 542.5                                             |
| C2019-004 | 24  | M   | N/A       | N/A                         | N/A         | N/A                   | N/A                       | N/A                  | N/A              | N/A       | WT                | N/A                           | N/A                                                      | 0.75                                                  | 731.25                                            |
| C2019-026 | 33  | M   | N/A       | N/A                         | N/A         | N/A                   | N/A                       | N/A                  | N/A              | N/A       | WT                | N/A                           | N/A                                                      | 1                                                     | 1308.75                                           |
| C2019-017 | 43  | M   | N/A       | N/A                         | N/A         | N/A                   | N/A                       | N/A                  | N/A              | N/A       | WT                | N/A                           | N/A                                                      | 4.625                                                 | 1707.5                                            |
| C2019-015 | 56  | F   | N/A       | N/A                         | N/A         | N/A                   | N/A                       | N/A                  | N/A              | N/A       | WT                | N/A                           | N/A                                                      | 0                                                     | 1890                                              |
| C2019-011 | 86  | M   | N/A       | N/A                         | N/A         | N/A                   | N/A                       | N/A                  | N/A              | N/A       | WT                | N/A                           | N/A                                                      | 0                                                     | 1030                                              |
| C2019-007 | 77  | F   | N/A       | N/A                         | N/A         | N/A                   | N/A                       | N/A                  | N/A              | N/A       | WT                | N/A                           | N/A                                                      | 8                                                     | 1400                                              |
| C2019-018 | 29  | F   | N/A       | N/A                         | N/A         | N/A                   | N/A                       | N/A                  | N/A              | N/A       | WT                | N/A                           | N/A                                                      | 8                                                     | 551.25                                            |
