# Supplementary material for: TERT Promoter Mutation Analysis for Blood-Based Diagnosis and Monitoring of Gliomas
Source: Oxford University Press journal article supplement (doi:10.1158/1078-0432.ccr-20-3083), 2020-10-13
Supplement: 10780432ccr203083-sup-248838_2_supp_6630725_qhp9hm.pdf [file 10780432ccr203083-sup-248838_2_supp_6630725_qhp9hm.pdf]

**Supplementary Table 3.** Patient Characteristics for Multi-Institution Cohort. Tumor volume calculated by taking three measurements and using the following formula:  $4\pi/3 * R1 * R2 * R3$ . GBM = Glioblastoma, WT= Wildtype, N/A = Not Available, M=Male, F=Female

| Cohort                         | Study ID | Age | Sex | WHO Grade | Diagnosis                                                                                               | IDH1 Status | Location                     | Volume (cm <sup>3</sup> ) | Contrast Enhancement | Duration (weeks) | Recurrent | TERT Status (MGH)   | Mutant Allele Frequency |
|--------------------------------|----------|-----|-----|-----------|---------------------------------------------------------------------------------------------------------|-------------|------------------------------|---------------------------|----------------------|------------------|-----------|---------------------|-------------------------|
| Operator                       | 1820     | 50  | M   | IV        | GBM w Small primitive neuronal component                                                                | UKN         | R Temporal                   | 106.85                    | YES                  | 2                | NO        | C228A               | 0.235                   |
| Operator                       | 2083     | 55  | M   | III       | Anaplastic Astrocytoma                                                                                  | WT          | L Occipital                  | 53.82                     | YES                  | 4                | NO        | C228T               | 0.609                   |
| Multi-institutional            | 2416     | 38  | M   | III       | Anaplastic Oligodendroglioma                                                                            | IDH1 R132H  | L Frontal                    | 29.4                      | YES                  | N/A              | NO        | C228T               | 2.369289                |
| Multi-institutional            | 2760     | 45  | M   | III       | Anaplastic Oligodendroglioma                                                                            | IDH1 R132H  | L Frontal                    | 56.7                      | YES                  | 28               | NO        | C228T               | 0.32967                 |
| Multi-institutional            | 743      | 40  | F   | N/A       | Astrocytoma with Elevated Proliferation Index                                                           | WT          | optic pathway                | 80.69                     | YES                  | 8                | NO        | C228T               | 0.683761                |
| Multi-institutional            | 2750     | 68  | M   | IV        | Diffuse Astrocytic Glioma with Molecular Features of GBM                                                | WT          | R Frontoparietal             | 16.53                     | NO                   | 6                | NO        | C228T               | 0.857143                |
| Multi-institutional            | 2854     | 68  | M   | IV        | Diffuse Astrocytic Glioma with Molecular Features of GBM                                                | WT          | Midline                      | 83.55                     | YES                  | 16               | NO        | C228T               | 0.491259                |
| Operator                       | 2341     | 77  | M   | IV        | Diffuse Astrocytoma                                                                                     | WT          | L temporo-occipital          | unknown                   | unknown              | 5                | NO        | C228T               | 0.52                    |
| Operator                       | 79       | 45  | F   | II        | Diffuse Astrocytoma                                                                                     | WT          | L Parietal                   | 172.65                    | NO                   | 78               | NO        | C228T               | 2.83                    |
| Operator                       | 1214     | 70  | M   | IV        | GBM                                                                                                     | WT          | L Frontal                    | 134.95                    | YES                  | 4                | NO        | C228T               | 0.896                   |
| Operator                       | 1784     | 56  | M   | IV        | GBM                                                                                                     | WT          | R Temporal                   | 2.7                       | YES                  | 38               | YES       | C228T               | 0.949                   |
| Operator                       | 2191     | 41  | M   | IV        | GBM                                                                                                     | WT          | R temporal                   | 85.99                     | YES                  | 3                | NO        | C228T               | 0.599                   |
| Operator                       | 2208     | 58  | M   | IV        | GBM                                                                                                     | WT          | Multifocal; L Frontotemporal | 103.36                    | YES                  | 5                | NO        | C228T               | 0.545                   |
| Operator                       | 2230     | 63  | F   | IV        | GBM                                                                                                     | WT          | R Temporal                   | 127.92                    | YES                  | N/A              | NO        | C228T               | 0.657                   |
| Multi-institutional            | 2279     | 75  | M   | IV        | GBM                                                                                                     | WT          | L Frontal                    | 29.6                      | YES                  | 6                | NO        | C228T               | 0.458716                |
| Multi-institutional            | 2632     | 72  | M   | IV        | GBM                                                                                                     | WT          | L temporal                   | 29.41                     | YES                  | 1                | NO        | C228T               | 0.637349                |
| Operator                       | 2933     | 54  | M   | IV        | GBM                                                                                                     | WT          | R Parieto-Occipital          | 104.65                    | YES                  | 3                | NO        | C228T               | 0.766                   |
| Operator                       | 2299     | 50  | M   | IV        | GBM                                                                                                     | WT          | R Occipital                  | N/A                       | YES                  | 8                | NO        | C228T               | 0.906                   |
| Multi-institutional            | 56       | 65  | M   | N/A       | Recurrent GBM                                                                                           | Negative    | Left Temporal                | 29.51                     | YES                  | 247              | YES       | C228T               | 0.608273                |
| Multi-institutional            | 1983     | 41  | F   | N/A       | Recurrent/Residual Diffuse Astrocytoma with Treatment Effects                                           | WT          | Occipital                    | 38.08                     | YES                  | 65               | YES       | C228T               | 1.856148                |
| Multi-institutional            | 1805     | 52  | F   | IV        | Recurrent/Residual Glioma                                                                               | WT          | L Temporo-parietal           | 28.59                     | YES                  | 33               | YES       | C228T               | 0.248679                |
| Operator                       | 1810     | 74  | F   | IV        | Residual GBM                                                                                            | WT          | L Temporal                   | 5.52                      | YES                  | 3                | NO        | C228T               | 0.25                    |
| Operator                       | 1799     | 58  | F   | IV        | GBM                                                                                                     | WT          | Multifocal; R Thalamic       | 129.65                    | YES                  | 0                | NO        | C228T               | 0.041                   |
| Operator                       | 1218     | 77  | F   | III       | Anaplastic Astrocytoma                                                                                  | WT          | L Fronto-temporal            | 100.5                     | NO                   | 24               | NO        | C250T               | 0.593                   |
| Multi-institutional            | 2676     | 85  | F   | IV        | GBM                                                                                                     | WT          | R Temporal                   | 47.52                     | YES                  | 3                | NO        | C250T               | 0.221484                |
| Multi-institutional            | 2309     | 60  | F   | IV        | GBM                                                                                                     | WT          | Midline                      | 29.29                     | YES                  | 59               | YES       | C250T               | 0.88                    |
| Operator                       | 1834     | 73  | M   | N/A       | Recurrent/Residual GBM                                                                                  | WT          | L Temporal                   | 81.18                     | YES                  | 33               | YES       | C250T               | 1.113                   |
| Multi-institutional            | 2062     | 56  | F   | IV        | GBM                                                                                                     | WT          | L Temporal                   | Unknown                   | Unknown              | Unknown          | NO        | MT, Unknown Variant | 2.504817                |
| Multi-institutional            | 2502     | 74  | M   | IV        | GBM                                                                                                     | IDH1 R132H  | L Parietal                   | 106.85                    | Unknown              | Unknown          | NO        | MT, Unknown Variant | 2.654867                |
| Multi-institutional            | 2511     | 62  | M   | IV        | GBM                                                                                                     | Negative    | R Frontoparietal             | 47.52                     | Unknown              | Unknown          | NO        | MT, Unknown Variant | 0.653061                |
| Multi-institutional            | 2521     | 64  | M   | IV        | GBM                                                                                                     | Negative    | R Frontal                    | Unknown                   | Unknown              | Unknown          | NO        | MT, Unknown Variant | 1.381215                |
| Multi-institutional            | 2535     | 46  | M   | IV        | GBM                                                                                                     | IDH1 R132H  | R Parietal                   | Unknown                   | Unknown              | Unknown          | NO        | MT, Unknown Variant | 1.473684                |
| Multi-institutional            | 2540     | 48  | M   | IV        | GBM                                                                                                     | Negative    | R Parietal                   | Unknown                   | Unknown              | Unknown          | NO        | MT, Unknown Variant | 0.565553                |
| Multi-institutional            | 2526     | 60  | F   | IV        | GBM                                                                                                     | WT          | L Temporal                   | Unknown                   | Unknown              | Unknown          | YES       | MT, Unknown Variant | 0.518135                |
| Multi-institutional            | 2531     | 69  | F   | IV        | GBM                                                                                                     | WT          | L Frontal                    | Unknown                   | Unknown              | Unknown          | YES       | MT, Unknown Variant | 0.35524                 |
| Multi-institutional            | 2492     | 67  | M   | IV        | Recurrent GBM                                                                                           | WT          | R Frontal                    | Unknown                   | Unknown              | Unknown          | YES       | MT, Unknown Variant | 0.318269                |
| Multi-institutional            | 2497     | 60  | F   | IV        | Recurrent GBM                                                                                           | WT          | R Occipital                  | 19.97                     | Unknown              | Unknown          | YES       | MT, Unknown Variant | 0.325071                |
| Multi-institutional            | 2545     | 66  | M   | IV        | Recurrent GBM                                                                                           | WT          | R Frontoparietal             | 7.58                      | Unknown              | Unknown          | YES       | MT, Unknown Variant | 0.30248                 |
| Multi-institutional            | 2517     | 62  | M   | IV        | Recurrent Gliosarcoma with Treatment Related Changes                                                    | IDH1 R132H  | L Temporal                   | 29.4                      | Unknown              | Unknown          | YES       | MT, Unknown Variant | 2.771619                |
| Multi-institutional            | 2055     | 56  | F   | IV        | Recurrens/Residual GBM                                                                                  | WT          | L Temporo-parietal           | Unknown                   | Unknown              | Unknown          | YES       | MT, Unknown Variant | 1.766304                |
| Multi-institutional            | 2514     | 44  | M   | N/A       | Recurrent/Residual GBM with Treatment Related Changes                                                   | WT          | R parietal                   | 86                        | Unknown              | Unknown          | YES       | MT, Unknown Variant | 0.906149                |
| Operator                       | 1906     | 31  | M   | N/A       | Recurrent/Residual Oligodendroglioma                                                                    | IDH1 R132H  | L Parietal                   | 79.56                     | NO                   | 113              | YES       | MT, Unknown Variant | 1.141                   |
| Operator                       | 3093     | 24  | F   | N/A       | N/A                                                                                                     | N/A         | N/A                          | N/A                       | N/A                  | N/A              | N/A       | N/A                 | 0.171                   |
| Multi-institutional            | 3098     | 64  | M   | N/A       | N/A                                                                                                     | N/A         | N/A                          | N/A                       | N/A                  | N/A              | N/A       | N/A                 | 0.397614                |
| Operator                       | 3100     | 85  | M   | N/A       | N/A                                                                                                     | N/A         | N/A                          | N/A                       | N/A                  | N/A              | N/A       | N/A                 | 0.086                   |
| Operator                       | 3116     | 76  | F   | N/A       | N/A                                                                                                     | N/A         | N/A                          | N/A                       | N/A                  | N/A              | N/A       | N/A                 | 0.594                   |
| Operator & Multi-institutional | 3127     | 47  | M   | N/A       | N/A                                                                                                     | N/A         | N/A                          | N/A                       | N/A                  | N/A              | N/A       | N/A                 | 0.25                    |
| Operator                       | 3129     | 42  | M   | N/A       | N/A                                                                                                     | N/A         | N/A                          | N/A                       | N/A                  | N/A              | N/A       | N/A                 | 0.384                   |
| Multi-institutional            | 3135     | 57  | F   | N/A       | N/A                                                                                                     | N/A         | N/A                          | N/A                       | N/A                  | N/A              | N/A       | N/A                 | 0.17679                 |
| Operator                       | 3144     | 23  | F   | N/A       | N/A                                                                                                     | N/A         | N/A                          | N/A                       | N/A                  | N/A              | N/A       | N/A                 | 0.152                   |
| Operator                       | 3150     | 56  | F   | N/A       | N/A                                                                                                     | N/A         | N/A                          | N/A                       | N/A                  | N/A              | N/A       | N/A                 | 0.457                   |
| Multi-institutional            | 3162     | 67  | F   | N/A       | N/A                                                                                                     | N/A         | N/A                          | N/A                       | N/A                  | N/A              | N/A       | N/A                 | 0.43                    |
| Multi-institutional            | 3163     | 61  | M   | N/A       | N/A                                                                                                     | N/A         | N/A                          | N/A                       | N/A                  | N/A              | N/A       | N/A                 | 0.403226                |
| Multi-institutional            | 3170     | 55  | F   | N/A       | N/A                                                                                                     | N/A         | N/A                          | N/A                       | N/A                  | N/A              | N/A       | N/A                 | 0.32                    |
| Multi-institutional            | 3172     | 53  | M   | N/A       | N/A                                                                                                     | N/A         | N/A                          | N/A                       | N/A                  | N/A              | N/A       | N/A                 | 0.229568                |
| Multi-institutional            | 3229     | 54  | M   | N/A       | N/A                                                                                                     | N/A         | N/A                          | N/A                       | N/A                  | N/A              | N/A       | N/A                 | 0.310752                |
| Multi-institutional            | 89       | 66  | M   | N/A       | Non Tumor; Biopsy Inconclusive                                                                          | WT          | R Frontotemporal             | 77.9                      | NO                   | 4                | NO        | N/A                 | 0.104932                |
| Multi-institutional            | 2293     | 72  | M   | N/A       | Non Tumor; Brain parenchyma with Demyelination, Macrophage and Lymphocyte-rich Infiltrates, and Gliosis | WT          | R Frontoparietal             | 13.23                     | YES                  | 4                | NO        | N/A                 | 0.18                    |
| Multi-institutional            | 1134     | 55  | M   | 0         | Non Tumor; Brain with Necrosis as well as Reactive and Inflammatory Changes                             | N/A         | Midline                      | 8.4                       | YES                  | 0                | NO        | N/A                 | 0                       |
| Multi-institutional            | 2624     | 44  | F   | 0         | Non Tumor; Demyelinating Lesion                                                                         | N/A         | L Frontal                    | 19.49                     | YES                  | 3                | NO        | N/A                 | 0.191113                |
| Multi-institutional            | 2866     | 63  | M   | 0         | Non Tumor; Fungal Abscess                                                                               | N/A         | L Frontal                    | 7.85                      | YES                  | 0                | NO        | N/A                 | 0.42                    |
| Multi-institutional            | 2732     | 62  | F   | 0         | Non Tumor; Hydrocephalus                                                                                | N/A         | N/A                          | N/A                       | N/A                  | N/A              | N/A       | N/A                 | 0.242522                |
| Multi-institutional            | 2821     | 67  | M   | 0         | Non Tumor; Normal Pressure Hydrocephalus                                                                | N/A         | N/A                          | N/A                       | N/A                  | N/A              | N/A       | N/A                 | 0.49                    |
| Multi-institutional            | 2275     | 46  | M   | III       | Anaplastic Astrocytoma                                                                                  | IDH1 R132H  | L Frontal                    | 97.24                     | NO                   | 4                | NO        | WT                  | 0                       |
| Operator                       | 2321     | 29  | F   | III       | Anaplastic Astrocytoma                                                                                  | IDH1 R132H  | L Temporal                   | 223.61                    | NO                   | 0                | NO        | WT                  | 0.340                   |
| Multi-institutional            | 2354     | 51  | F   | III       | Anaplastic Astrocytoma                                                                                  | WT          | R Temporal                   | 20.88                     | YES                  | 0                | NO        | WT                  | 0.635124                |
| Multi-institutional            | 1816     | 31  | M   | III       | Anaplastic Astrocytoma                                                                                  | IDH1 R132H  | R Temporal                   | 2.7                       | NO                   | 164              | YES       | WT                  | 0.09                    |
| Operator                       | 2312     | 38  | M   | II        | Diffuse Astrocytoma                                                                                     | WT          | R Frontal                    | 36.56                     | NO                   | N/A              | NO        | WT                  | 0.151                   |
| Multi-institutional            | 153      | 54  | M   | IV        | GBM                                                                                                     | WT          | R Occipital                  | 7.58                      | YES                  | 3                | NO        | WT                  | 0.24                    |
| Multi-institutional            | 2399     | 56  | M   | IV        | GBM                                                                                                     | WT          | R Parietal                   | 19.97                     | YES                  | 3                | NO        | WT                  | 0.719424                |
| Multi-institutional            | 2797     | 66  | M   | N/A       | Non Tumor; Normal Pressure Hydrocephalus                                                                | N/A         | N/A                          | N/A                       | N/A                  | N/A              | N/A       | N/A                 | 0.438917                |
| Multi-institutional            | 1175     | 78  | F   | N/A       | Non Tumor; Subacute Intraparenchymal Hemorrhage                                                         | N/A         | R Frontal                    | 131.67                    | N/A                  | 5                | NO        | WT                  | 0.29                    |
| Multi-institutional            | 1558     | 53  | F   | III       | Recurrent/Residual Anaplastic Astrocytoma                                                               | IDH1 R132H  | L Frontal                    | 175.22                    | YES                  | 249              | YES       | WT                  | 0.171024                |
| Operator                       | 1655     | 38  | M   | III       | Recurrent/Residual Infiltrating Astrocytoma                                                             | IDH1 R132G  | Midline                      | 14.87                     | YES                  | 321              | YES       | WT                  | 0.458                   |
