# Supplementary material for: TERT Promoter Mutation Analysis for Blood-Based Diagnosis and Monitoring of Gliomas
Source: Oxford University Press journal article supplement (doi:10.1158/1078-0432.ccr-20-3083), 2020-10-13
Supplement: 10780432ccr203083-sup-248838_2_supp_6630726_qh79hm.pdf [file 10780432ccr203083-sup-248838_2_supp_6630726_qh79hm.pdf]

**Supplementary Table 2.** Patient Characteristics for Discovery Cohort 2. Tumor volume calculated by taking three measurements and using the following formula:  $4\pi/3 * R1 * R2 * R3$ . GBM = Glioblastoma, WT= Wildtype, N/A = Not Available, M=Male, F=Female

| Blinded Cohort # | Age | Sex | WHO Grade | Diagnosis                                   | IDH1 status | Location                            | Volume (cm <sup>3</sup> ) | Contrast Enhancement | Duration (weeks)   | Recurrence | TERT Status (MGH) | TERT Status by ddPCR (Tissue) | Mutant Allele Frequency | Copies/mL of TERT Mutant from ddPCR of Matched Plasma | Copies/mL of TERT WT from ddPCR of Matched Plasma |
|------------------|-----|-----|-----------|---------------------------------------------|-------------|-------------------------------------|---------------------------|----------------------|--------------------|------------|-------------------|-------------------------------|-------------------------|-------------------------------------------------------|---------------------------------------------------|
| 1                | 67  | F   | IV        | GBM                                         | WT          | Right multifocal anterior temporal  | 13.57                     | YES                  | 12                 | NO         | WT                | WT                            | 6.7                     | 8.38                                                  | 713.75                                            |
| 2                | 56  | M   | IV        | GBM                                         | WT          | Right parietal                      | 97.64                     | YES                  | 8                  | NO         | C228T             | C228T                         | 3095                    | 1.5                                                   | 993.75                                            |
| 3                | 24  | M   | IV        | GBM                                         | WT          | Left parietal                       | 24.93                     | YES                  | 12                 | NO         | WT                | WT                            | 1.9                     | 1.13                                                  | 2815                                              |
| 4                | 64  | M   | IV        | GBM                                         | WT          | Left parietal and posterior frontal | 465.51                    | YES                  | 20                 | NO         | C228T             | C228T                         | 1911                    | 12.63                                                 | 1046.25                                           |
| 5                | 65  | M   | IV        | GBM                                         | WT          | Left parietal                       | 231.68                    | YES                  | 4                  | NO         | C250T             | C250T                         | 1089                    | 12.13                                                 | 666.25                                            |
| 6                | 46  | F   | IV        | GBM                                         | WT          | Right frontoparietal                | 290.60                    | YES                  | 2                  | NO         | C250T             | C250T                         | 957                     | 9.5                                                   | 1487.5                                            |
| 7                | 67  | M   | IV        | GBM                                         | WT          | Right frontoparietal                | 522.40                    | YES                  | 3                  | NO         | C250T             | C250T                         | 333                     | 8.88                                                  | 402.5                                             |
| 8                | 66  | M   | IV        | GBM                                         | WT          | Right parietal                      | 304.42                    | YES                  | 2                  | NO         | C228T             | C228T                         | 1927                    | 23.38                                                 | 1196.25                                           |
| 9                | 61  | M   | IV        | Recurrent/Residual GBM                      | WT          | Right frontal lobe                  | 7.35                      | YES                  | 2                  | YES        | WT                | N/A                           | N/A                     | 0                                                     | 467.5                                             |
| 10               | 43  | M   | IV        | GBM                                         | IDH1 R132H  | Left frontal                        | 343.94                    | YES                  | 12                 | NO         | WT                | WT                            | 1.8                     | 0                                                     | 1033.75                                           |
| 11               | 52  | M   | IV        | GBM                                         | WT          | Left frontal                        | 515.12                    | YES                  | 3                  | NO         | Unknown Mutant    | C228T                         | 1370                    | 6.75                                                  | 1421.25                                           |
| 12               | 69  | M   | IV        | GBM                                         | WT          | Right frontal                       | 90.48                     | YES                  | 3                  | NO         | WT                | WT                            | 1.2                     | 0.88                                                  | 22350                                             |
| 13               | 74  | F   | IV        | Recurrent/Residual GBM                      | WT          | Left anterior temporal              | 17.34                     | YES                  | 4                  | YES        | C228T             | C228T                         | 1512                    | 6.88                                                  | 970                                               |
| 14               | 50  | M   | IV        | GBM                                         | WT          | Right temporal                      | 335.67                    | YES                  | 3                  | NO         | C228T             | C228T                         | 116                     | 0                                                     | 536.25                                            |
| 15               | 82  | M   | IV        | GBM                                         | WT          | Right parietal                      | 74.57                     | YES                  | 1                  | NO         | C228T             | C228T                         | 1888                    | 11.13                                                 | 752.5                                             |
| 16               | 31  | M   | II        | Recurrent/Residual Oligodendroglioma        | IDH1 R132H  | Left parietal                       | 50.72                     | YES                  | 9                  | YES        | Unknown Mutant    | C228T                         | 2767                    | 11.63                                                 | 1061.25                                           |
| 17               | 38  | M   | III       | Recurrent/Residual Infiltrating Astrocytoma | IDH1 R132G  | Left posterior cingulum             | 42.98                     | YES                  | N/A                | YES        | WT                | WT                            | 5.3                     | 5.75                                                  | 1023.75                                           |
| 18               | 73  | F   | IV        | GBM                                         | WT          | Left parieto-occipital              | 127.91                    | YES                  | 1                  | NO         | C228T             | C228T                         | 1037                    | 4                                                     | 492.5                                             |
| 19               | 71  | M   | IV        | GBM                                         | WT          | Left anterior temporal              | 200.81                    | YES                  | 4                  | NO         | C228T             | C228T                         | 8710                    | 3.88                                                  | 1575                                              |
| 20               | 60  | F   | IV        | GBM                                         | WT          | Right frontal                       | 153.06                    | YES                  | 3                  | NO         | C228T             | C228T                         | 7350                    | 6.25                                                  | 1956.25                                           |
| 21               | 64  | F   | IV        | Recurrent/Residual GBM                      | IDH1 R132H  | Right frontal                       | 11.08                     | YES                  | 3                  | YES        | WT                | WT                            | 4.4                     | 12.38                                                 | 1052.5                                            |
| 22               | 61  | F   | IV        | GBM                                         | WT          | Right frontal                       | 205.84                    | YES                  | 3                  | NO         | C228T             | C228T                         | 764                     | 9.13                                                  | 1800                                              |
| 23               | 58  | M   | IV        | GBM                                         | WT          | Left frontotemporal                 | 451.89                    | YES                  | 1                  | NO         | C228T             | C228T                         | 4200                    | 12.25                                                 | 1252.5                                            |
| 24               | 43  | M   | III       | Recurrent/Residual Anaplastic Astrocytoma   | IDH1 R132H  | Middle frontal gyrus                | 40.97                     | YES                  | 8                  | YES        | WT                | WT                            | 2.5                     | 4.75                                                  | 287.5                                             |
| 25               | 50  | M   | IV        | GBM                                         | WT          | Right occipital                     | 30.41                     | YES                  | 8                  | NO         | C228T             | C228T                         | 766                     | 18.25                                                 | 1991.25                                           |
| 26               | 38  | M   | II        | Diffuse Astrocytoma                         | WT          | Right frontal                       | 115.36                    | YES                  | Incidental Finding | NO         | WT                | WT                            | 3.5                     | 6.75                                                  | 888.75                                            |
| 27               | 29  | F   | III       | Anaplastic Astrocytoma                      | IDH1 R132H  | Left temporal                       | 702.49                    | YES                  | 4                  | NO         | WT                | WT                            | 2.3                     | 5.5                                                   | 852.5                                             |
| 28               | 51  | F   | III       | Anaplastic Astrocytoma                      | WT          | Right temporal                      | 65.60                     | YES                  | 1                  | NO         | WT                | WT                            | 7.4                     | 2.13                                                  | 973.75                                            |
| 29               | 50  | M   | IV        | Recurrent/Residual GBM                      | WT          | Right frontal                       | 17.91                     | YES                  | N/A                | YES        | C250T             | C250T                         | 639                     | 10.13                                                 | 853.75                                            |
| 30               | 69  | F   | IV        | GBM                                         | WT          | Cerebellar                          | 16.91                     | YES                  | 5                  | NO         | WT                | WT                            | 7.3                     | 7.38                                                  | 2983.75                                           |
| 31               | 31  | F   | IV        | GBM                                         | IDH1 R132G  | Right frontal                       | 45.24                     | YES                  | N/A                | YES        | WT                | WT                            | 0                       | 0                                                     | 2083.75                                           |
| 32               | 48  | F   | N/A       | N/A                                         | N/A         | N/A                                 | N/A                       | N/A                  | N/A                | N/A        | WT                | N/A                           | N/A                     | 5.75                                                  | 443.75                                            |
| 33               | 28  | F   | N/A       | N/A                                         | N/A         | N/A                                 | N/A                       | N/A                  | N/A                | N/A        | WT                | N/A                           | N/A                     | 0                                                     | 671.25                                            |
| 34               | 24  | F   | N/A       | N/A                                         | N/A         | N/A                                 | N/A                       | N/A                  | N/A                | N/A        | WT                | N/A                           | N/A                     | 3.25                                                  | 1176.25                                           |
| 35               | 29  | F   | N/A       | N/A                                         | N/A         | N/A                                 | N/A                       | N/A                  | N/A                | N/A        | WT                | N/A                           | N/A                     | 0                                                     | 1812.5                                            |
| 36               | 23  | F   | N/A       | N/A                                         | N/A         | N/A                                 | N/A                       | N/A                  | N/A                | N/A        | WT                | N/A                           | N/A                     | 0                                                     | 1892.5                                            |
| 37               | 23  | F   | N/A       | N/A                                         | N/A         | N/A                                 | N/A                       | N/A                  | N/A                | N/A        | WT                | N/A                           | N/A                     | 1.25                                                  | 567.5                                             |
| 38               | 25  | F   | N/A       | N/A                                         | N/A         | N/A                                 | N/A                       | N/A                  | N/A                | N/A        | WT                | N/A                           | N/A                     | 1                                                     | 1023.75                                           |
| 39               | 33  | M   | N/A       | N/A                                         | N/A         | N/A                                 | N/A                       | N/A                  | N/A                | N/A        | WT                | N/A                           | N/A                     | 0                                                     | 1753.75                                           |
| 40               | 30  | F   | N/A       | N/A                                         | N/A         | N/A                                 | N/A                       | N/A                  | N/A                | N/A        | WT                | N/A                           | N/A                     | 3.5                                                   | 726.25                                            |
| 41               | 24  | F   | N/A       | N/A                                         | N/A         | N/A                                 | N/A                       | N/A                  | N/A                | N/A        | WT                | N/A                           | N/A                     | 1.88                                                  | 1230                                              |
| 42               | 70  | F   | IV        | GBM                                         | WT          | Corpus callosum/lateral ventricles  | 102.22                    | YES                  | 3                  | NO         | C228T             | N/A                           | N/A                     | 21.13                                                 | 1651.25                                           |
| 43               | 71  | M   | IV        | GBM                                         | WT          | Right parietal                      | 36.88                     | YES                  | 8                  | NO         | C250T             | N/A                           | N/A                     | 10.63                                                 | 6325                                              |
| 44               | 54  | F   | IV        | GBM                                         | WT          | Left thalamic                       | 176.43                    | YES                  | 2                  | NO         | C228T             | N/A                           | N/A                     | 4.25                                                  | 1527.5                                            |
| 45               | 70  | M   | IV        | GBM                                         | WT          | Left frontal                        | 423.95                    | YES                  | 4                  | NO         | C228T             | N/A                           | N/A                     | 10                                                    | 1587.5                                            |
| 46               | 59  | F   | IV        | GBM                                         | WT          | Left frontal                        | 71.43                     | YES                  | N/A                | YES        | C228T             | N/A                           | N/A                     | 13.88                                                 | 2441.67                                           |
| 47               | 69  | M   | IV        | GBM                                         | WT          | Bifrontal, corpus callosum          | 37.25                     | YES                  | 3                  | NO         | C250T             | N/A                           | N/A                     | 14.125                                                | 1197.5                                            |
| 48               | 56  | M   | IV        | GBM                                         | WT          | Left frontal                        | 88.22                     | YES                  | 4                  | NO         | C228T             | N/A                           | N/A                     | 31                                                    | 1203.75                                           |
