# Supplementary figures and images for: TERT Promoter Mutation Analysis for Blood-Based Diagnosis and Monitoring of Gliomas
Source: Oxford University Press journal article supplement (doi:10.1158/1078-0432.ccr-20-3083), 2020-10-13

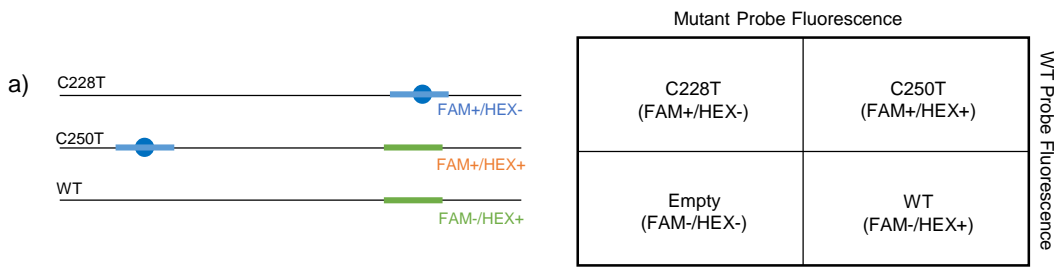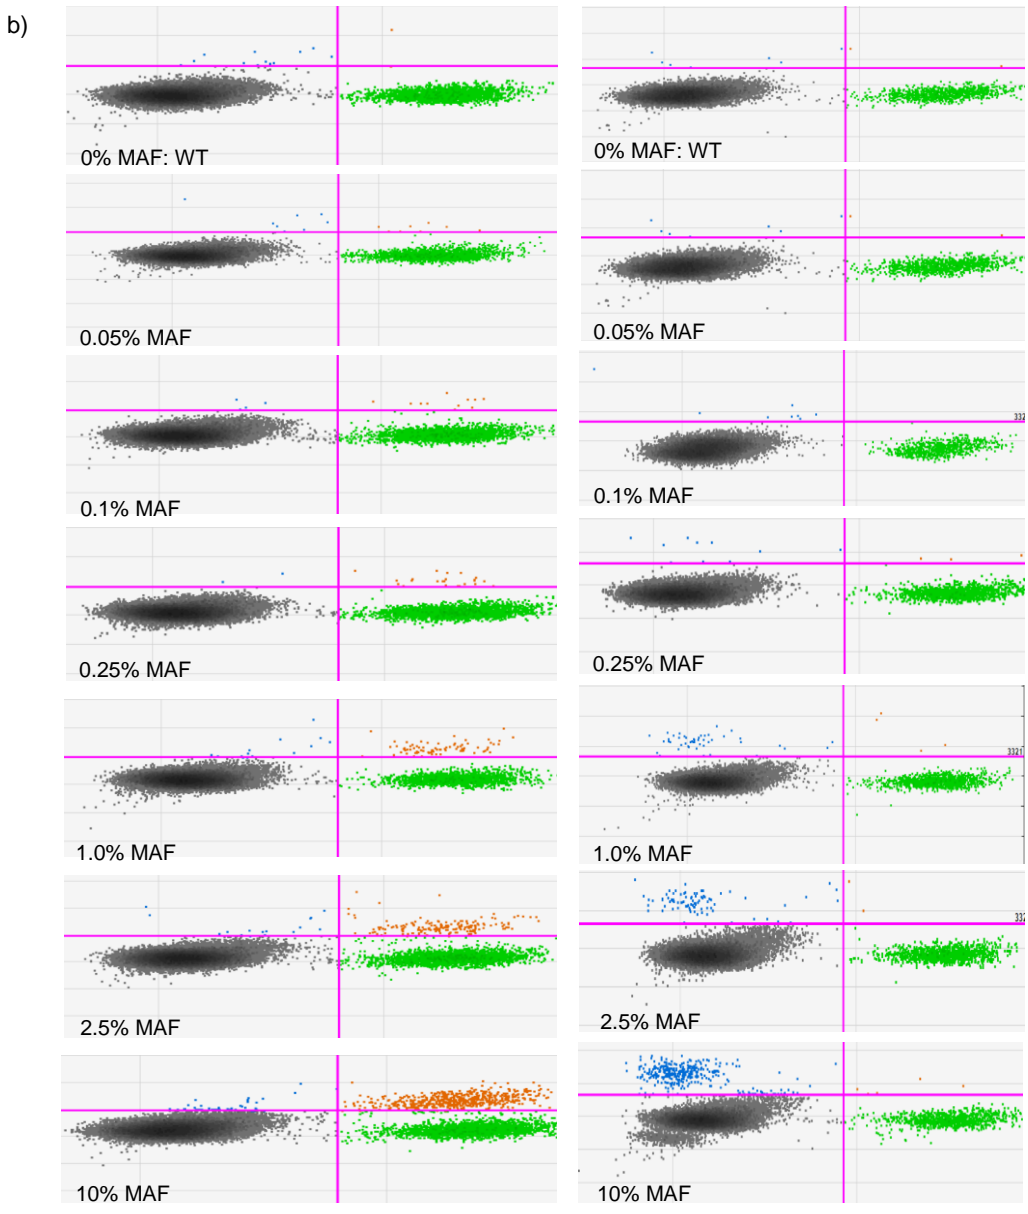

Supplementary Figure 1

Supplement: 10780432ccr203083-sup-248838_2_supp_6630719_qh59hm.pdf [file 10780432ccr203083-sup-248838_2_supp_6630719_qh59hm.pdf]

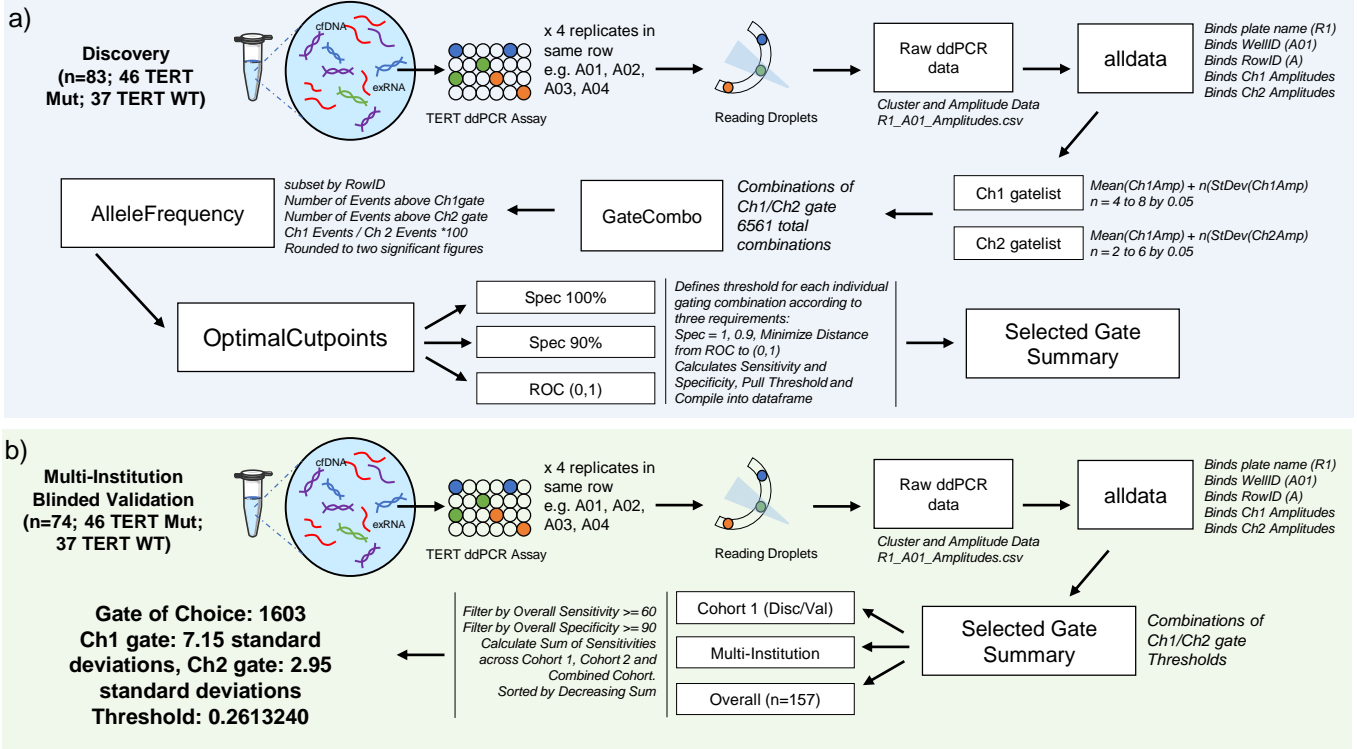

Supplementary Figure 2

Supplement: 10780432ccr203083-sup-248838_2_supp_6630720_qh39hm.pdf [file 10780432ccr203083-sup-248838_2_supp_6630720_qh39hm.pdf]

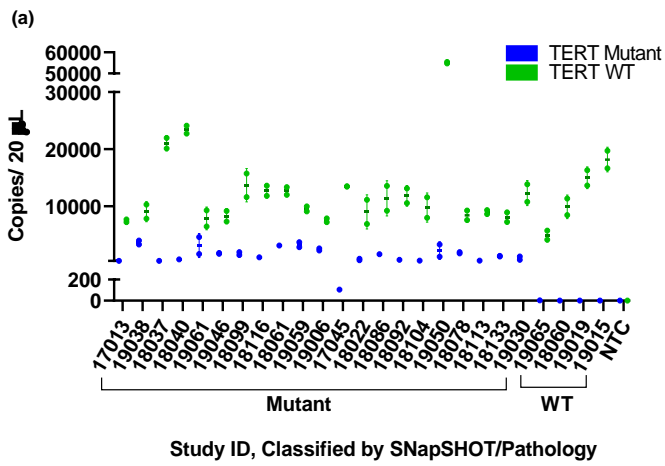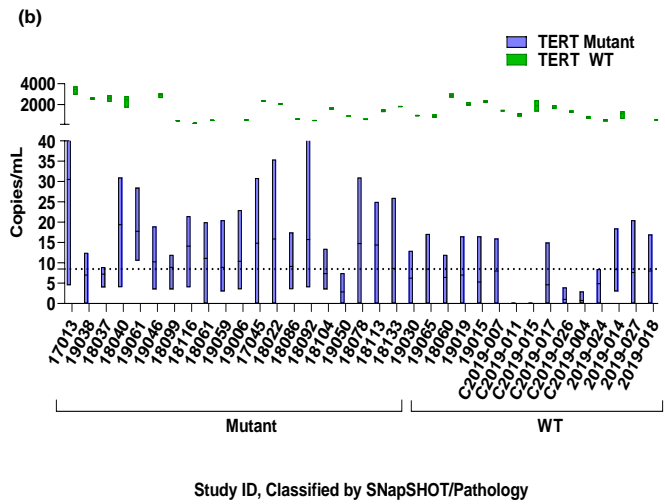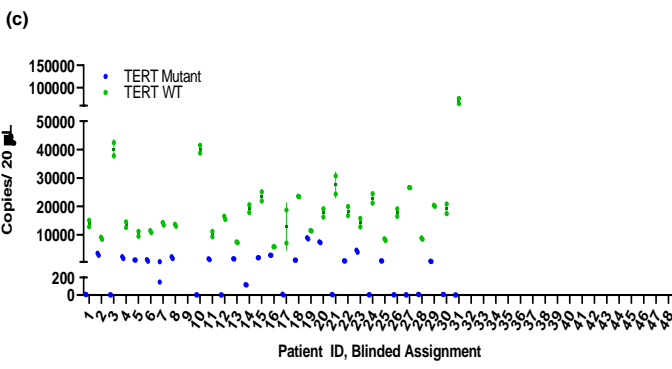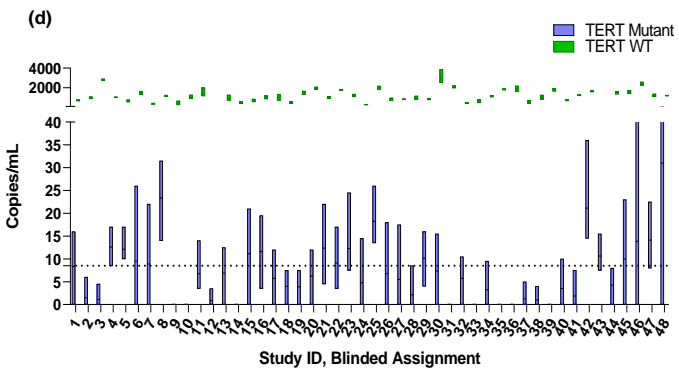

Supplementary Figure 3

Supplement: 10780432ccr203083-sup-248838_2_supp_6630721_qh29hm.pdf [file 10780432ccr203083-sup-248838_2_supp_6630721_qh29hm.pdf]

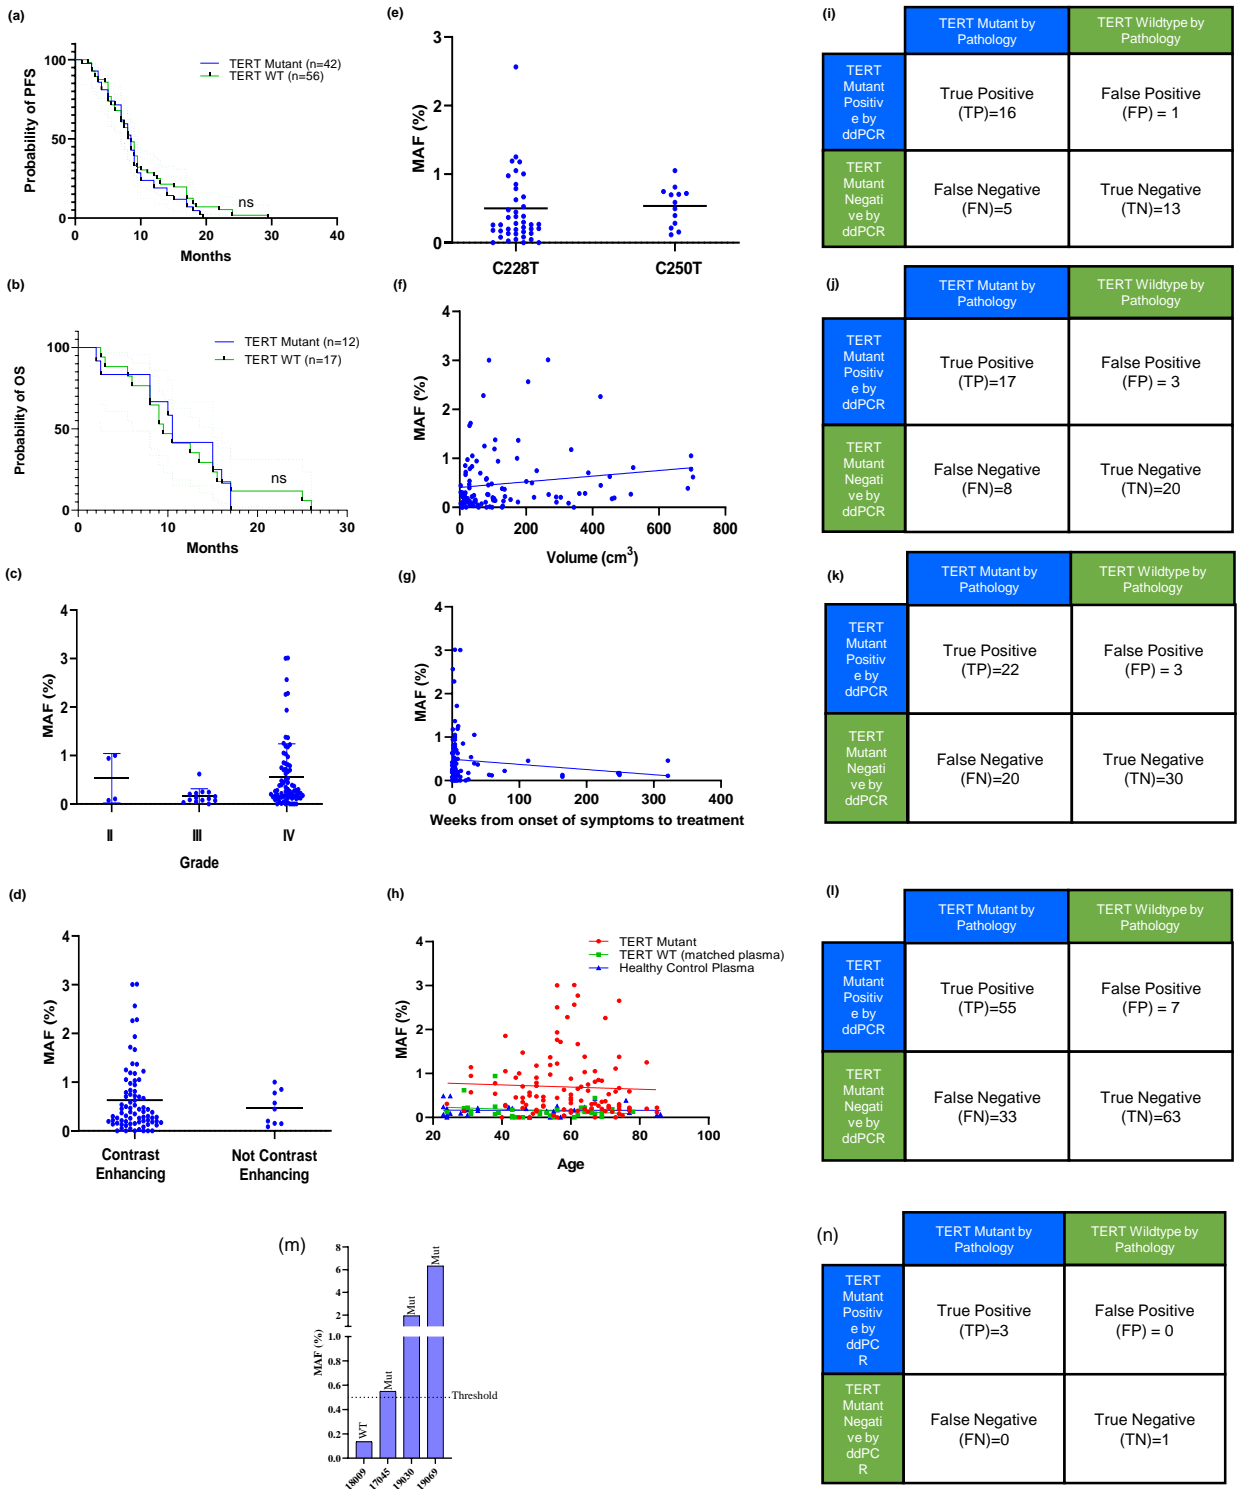

Supplementary Figure 4

Supplement: 10780432ccr203083-sup-248838_2_supp_6630722_qhl9hm.pdf [file 10780432ccr203083-sup-248838_2_supp_6630722_qhl9hm.pdf]
